# Supplementary material for: Differential Responses of Antioxidative System during the Interaction of Soursop Fruits (Annona muricata L.) and Nectria haematococca at Postharvest Storage
Source: MDPI journal article supplement (doi:10.3390/plants10071432), 2021-07-14
Supplement: s1 [file s1]

Table S1. Two-way ANOVA of all the variables analyzed.

| Total Phenols   | Df  | Sum Sq | Mean Sq | F value | Pr(>F)       |
|-----------------|-----|--------|---------|---------|--------------|
| Day             | 2   | 38619  | 19310   | 49.531  | 9.31e-16 *** |
| Inoculation     | 1   | 192    | 192     | 0.492   | 0.48459      |
| Day:Inoculation | 2   | 5496   | 2748    | 7.048   | 0.00136 **   |
| Residuals       | 102 | 39765  | 390     |         |              |
| DPPH            | Df  | Sum Sq | Mean Sq | F value | Pr(>F)       |
| Day             | 2   | 58281  | 29141   | 15.372  | 1.46e-06 *** |
| Inoculation     | 1   | 723    | 723     | 0.381   | 0.53825      |
| Day:Inoculation | 2   | 25663  | 12832   | 6.769   | 0.00174 **   |
| Residuals       | 102 | 193358 | 1896    |         |              |
| ABTS            | Df  | Sum Sq | Mean Sq | F value | Pr(>F)       |
| Day             | 2   | 82845  | 41422   | 5.033   | 0.00823 **   |
| Inoculation     | 1   | 29282  | 29282   | 3.558   | 0.06210 .    |
| Day:Inoculation | 2   | 43872  | 21936   | 2.665   | 0.07441 .    |
| Residuals       | 102 | 839423 | 8230    |         |              |
| FRAP            | Df  | Sum Sq | Mean Sq | F value | Pr(>F)       |
| Day             | 2   | 739.0  | 369.5   | 25.756  | 8.82e-10 *** |
| Inoculation     | 1   | 56.9   | 56.9    | 3.967   | 0.04909 *    |
| Day:Inoculation | 2   | 200.9  | 100.4   | 7.000   | 0.00142 **   |
| Residuals       | 102 | 1463.4 | 14.3    |         |              |
| PPO activity    | Df  | Sum Sq | Mean Sq | F value | Pr(>F)       |
| Day             | 2   | 24434  | 12217   | 18.247  | 0.00023 ***  |
| Inoculation     | 1   | 29498  | 29498   | 44.056  | 2.4e-05 ***  |
| Day:Inoculation | 2   | 13022  | 6511    | 9.725   | 0.00309 **   |
| Residuals       | 12  | 8035   | 670     |         |              |
| SOD activity    | Df  | Sum Sq | Mean Sq | F value | Pr(>F)       |
| Day             | 2   | 1428.2 | 714.1   | 22.977  | 7.88e-05 *** |
| Inoculation     | 1   | 2.7    | 2.7     | 0.087   | 0.773        |
| Day:Inoculation | 2   | 125.2  | 62.6    | 2.014   | 0.176        |
| Residuals       | 12  | 372.9  | 31.1    |         |              |
| SOD expression  | Df  | Sum Sq | Mean Sq | F value | Pr(>F)       |
| Day             | 2   | 203.22 | 101.61  | 5.077   | 0.0253 *     |
| Inoculation     | 1   | 63.66  | 63.66   | 3.181   | 0.0998 .     |
| Day:Inoculation | 2   | 203.22 | 101.61  | 5.077   | 0.0253 *     |
| Residuals       | 12  | 240.14 | 20.01   |         |              |

| PPO expression  | Df | Sum Sq | Mean Sq | F value | Pr(>F)       |
|-----------------|----|--------|---------|---------|--------------|
| Day             | 2  | 29.202 | 14.601  | 13.730  | 0.000791 *** |
| Inoculation     | 1  | 6.469  | 6.469   | 6.082   | 0.029697 *   |
| Day:Inoculation | 2  | 29.202 | 14.601  | 13.730  | 0.000791 *** |
| Residuals       | 12 | 12.762 | 1.063   |         |              |

Significant codes: 0 '\*\*\*' 0.001 '\*\*' 0.01 '\*' 0.05 '.' 0.1 ' ' 1

**Table S2. Eigenvalue, variance percent and cumulative variance percent of the principal component analysis**

|     | eigenvalue   | variance.percent | cumulative.variance.percent |
|-----|--------------|------------------|-----------------------------|
| PC1 | 3.525640     | 4.407050e+01     | 44.07050                    |
| PC2 | 2.179665     | 2.724582e+01     | 71.31631                    |
| PC3 | 1.935024     | 2.418780e+01     | 95.50412                    |
| PC4 | 0.2553629    | 3.192036e+00     | 98.69615                    |
| PC5 | 0.1043076    | 1.303845e+00     | 100.00000                   |
| PC6 | 7.507267e-32 | 9.384084e-31     | 100.00000                   |

**Table S3. Correlation coefficients values (r)**

|         | Phenols  | DPPH      | ABTS      | FRAP      | PPO_act   | SOD_act   | PPO_exp   | SOD_exp  |
|---------|----------|-----------|-----------|-----------|-----------|-----------|-----------|----------|
| Phenols | 1.00000  | -0.931751 | 0.44702   | -0.71443  | -0.76986  | 0.962392  | -0.292298 | -0.40981 |
| DPPH    | -0.93175 | 1.00000   | -0.223712 | 0.8578296 | 0.60740   | -0.989137 | 0.014517  | 0.11820  |
| ABTS    | 0.44702  | -0.223712 | 1.000000  | 0.29094   | -0.90866  | 0.354777  | -0.068764 | -0.19498 |
| FRAP    | -0.71443 | 0.857829  | 0.290942  | 1.00000   | 0.133749  | -0.785045 | 0.115113  | 0.14903  |
| PPO_act | -0.76986 | 0.607400  | -0.908663 | 0.13374   | 1.000000  | -0.711735 | 0.104409  | 0.250250 |
| SOD_act | 0.96239  | -0.989137 | 0.354777  | -0.78504  | -0.71173  | 1.00000   | -0.058332 | -0.17448 |
| PPO_exp | -0.29229 | 0.014517  | -0.068764 | 0.11511   | 0.1044090 | -0.058332 | 1.00000   | 0.98882  |
| SOD_exp | -0.40981 | 0.118205  | -0.194988 | 0.14903   | 0.25025   | -0.174482 | 0.988828  | 1.00000  |

**Table S4. Correlation coefficients values (p)**

|                | Phenols   | DPPH       | ABTS      | FRAP      | PPO_act   | SOD_act    | PPO_exp    | SOD_exp    |
|----------------|-----------|------------|-----------|-----------|-----------|------------|------------|------------|
| <b>Phenols</b> | NA        | 7.5461e-04 | 0.2668018 | 0.0464602 | 0.0254524 | 1.2925e-04 | 4.8235e-01 | 3.1329e-01 |
| <b>DPPH</b>    | 0.0007546 | NA         | 0.5943237 | 0.0064397 | 0.1102350 | 3.1784e-06 | 9.7278e-01 | 7.8042e-01 |
| <b>ABTS</b>    | 0.2668018 | 5.9432e-01 | NA        | 0.4844859 | 0.0017768 | 3.8850e-01 | 8.7147e-01 | 6.4355e-01 |
| <b>FRAP</b>    | 0.0464602 | 6.4397e-03 | 0.4844859 | NA        | 0.7521941 | 2.0999e-02 | 7.8606e-01 | 7.2466e-01 |
| <b>PPO_act</b> | 0.0254524 | 1.1023e-01 | 0.0017768 | 0.7521941 | NA        | 4.7684e-02 | 8.0565e-01 | 5.5000e-01 |
| <b>SOD_act</b> | 0.0001292 | 3.1784e-06 | 0.3885029 | 0.0209993 | 0.0476840 | NA         | 8.9087e-01 | 6.7942e-01 |
| <b>PPO_exp</b> | 0.4823572 | 9.7278e-01 | 0.8714718 | 0.7860621 | 0.8056511 | 8.9087e-01 | NA         | 3.4563e-06 |
| <b>SOD_exp</b> | 0.3132948 | 7.8042e-01 | 0.6435574 | 0.7246658 | 0.5500031 | 6.7942e-01 | 3.4563e-06 | NA         |
